# Supplementary material
Source: PubMed Central journal article supplement (PMC391078)
Supplement: 7600174s1.pdf [file 7600174s1.pdf]

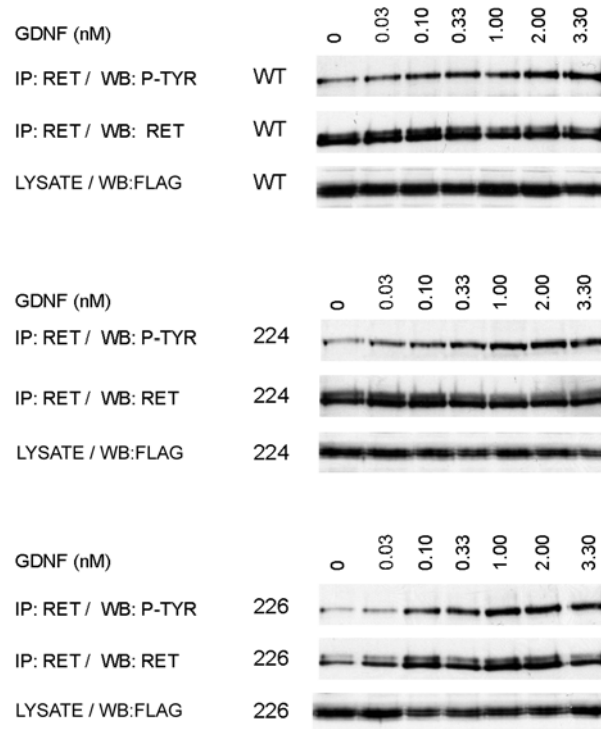

**Supplementary material, Figure 1** Dose-dependent phosphorylation of RET mediated by wild-type (WT), R224A and R226A mutant  $GFR\alpha 1$ . The assay was performed in transiently transfected MG87-RET cells, stimulated with 0 – 3.3 nM of GDNF. To ensure that the expression of the mutant was the same in all parallel lanes, a fraction of each extract was used for direct probing with anti-FLAG antibodies. Thereafter, RET was immunoprecipitated (IP) from the cell extracts, and its phosphorylation was monitored on Western blots with antibodies to phosphotyrosine (P-TYR). The immunoprecipitated samples were re probed with antibodies to RET to verify equal loading of proteins in all parallel lanes.
