# Supplementary material
Source: PubMed Central journal article supplement (PMC391078)
Supplement: 7600174s2.pdf [file 7600174s2.pdf]

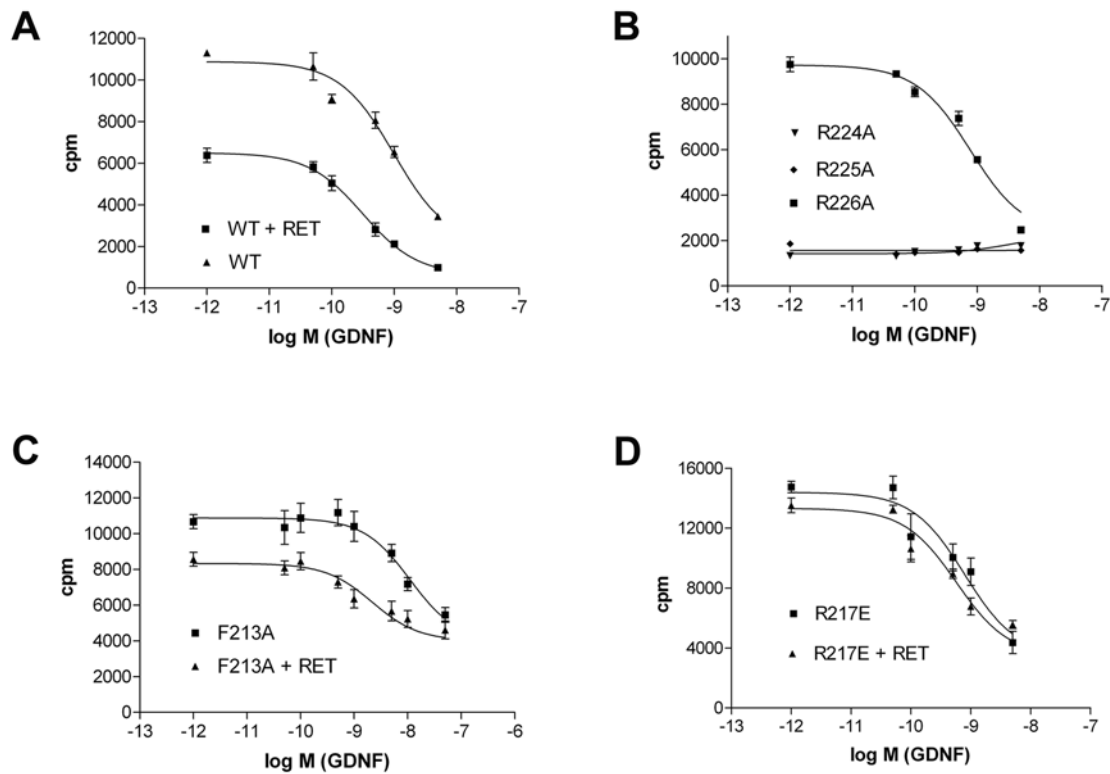

**Supplementary material, Figure 2** Competition of  $^{125}\text{I}$ -GDNF binding to GFR $\alpha$ 1 variants expressed in COS7 cells. **(A)** Displacement of 50 pM  $^{125}\text{I}$ -GDNF bound to wild-type (WT) GFR $\alpha$ 1 expressing COS7 cells by unlabeled GDNF. Data is shown with and without co-expression of RET. Each data point represents the mean of three or four independent determinations  $\pm$  S.E. The binding isotherms fitted using nonlinear regression for one-site homologous competition are plotted. **(B)** Same as (A) for R224A, R225A and R226A mutants without the co-expression of RET. No data fitting was attempted for the R224A and R225A mutants as there is no binding. **(C)** Same as (A) for F213A mutant with and without co-expression of RET. **(D)** Same as (A) for R217E mutant with and without co-expression of RET.
