# Supplementary material
Source: PubMed Central journal article supplement (PMC391078)
Supplement: 7600174s3.pdf [file 7600174s3.pdf]

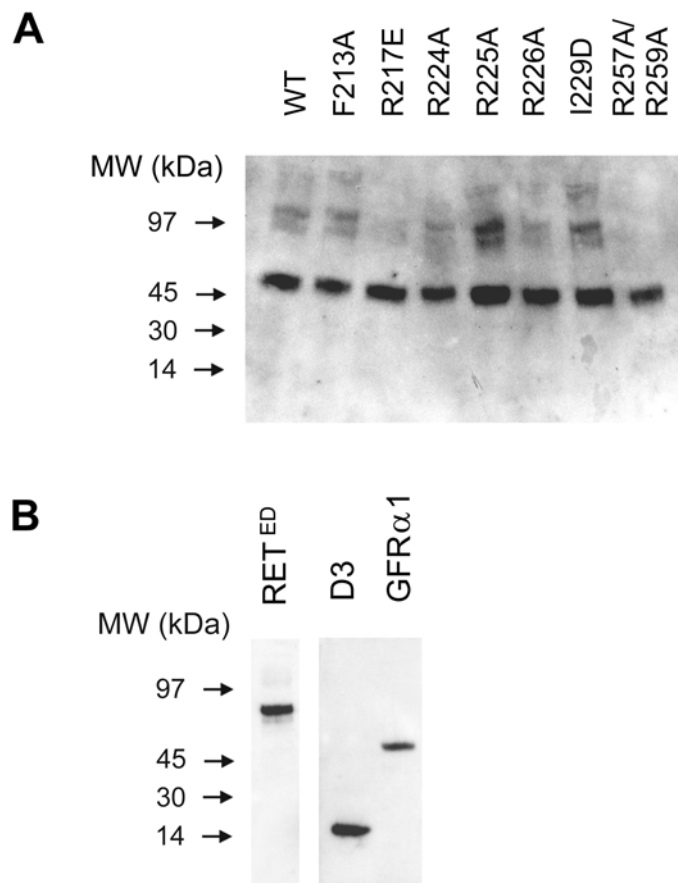

**Supplementary material, Figure 3** Analysis of soluble GFR $\alpha$ 1 variant and RET extracellular domain expression in insect cells. **(A)** The wild-type (WT) and variant GFR $\alpha$ 1 medium supernatants after centrifugation for 10 min at 2000 x g, +4°C were resolved on a 8-25% SDS-PAGE gel and Western blotted with anti-FLAG antibodies. **(B)** RET extracellular domain (RET<sup>ED</sup>) medium supernatant after centrifugation for 10 min at 2000 x g, +4°C was resolved on a 8-25% SDS-PAGE gel and Western blotted with anti-FLAG antibodies. Purified GFR $\alpha$ 1 domain 3 (D3) and soluble GFR $\alpha$ 1 medium supernatant from the same SDS-PAGE run and anti-FLAG Western blotting are shown for reference.
